# Supplementary material
Source: PubMed Central journal article supplement (PMC3318133)
Supplement: mmc1.pdf [file mmc1.pdf]

## **Supporting Material**

**Mechanisms by which cytoplasmic calcium wave propagation and alternans are generated in cardiac atrial myocytes lacking t-tubules – insights from a simulation study**

Qince Li, Stephen C. O'Neill, Tao Tao, Yatong Li, David Eisner, and Henggui Zhang

## GLOSSARY

$[Ca^{2+}]_i$  Myoplasmic  $Ca^{2+}$  concentration

$[Ca^{2+}]_{J/NJ}$   $Ca^{2+}$  concentration in junctional and non-junctional compartments adjacent to RyRs

$[Ca^{2+}]_o$  Extracellular  $Ca^{2+}$  concentration

$[Ca^{2+}]_{rel}$   $Ca^{2+}$  concentration in junctional SR

$[Ca^{2+}]_{up}$   $Ca^{2+}$  concentration in network SR

$[CQ]_{tot}$  Total calsequestrin concentration

$[CM]_{tot}$  Total calmodulin concentration

$d_L$  Activation gating variable for  $I_{Ca,L}$

$d_{L,\infty}$  Steady-state  $d_L$

$d_{NaCa}$  Denominator constant for  $I_{NaCa}$

$d_T$  Activation gating variable for  $I_{Ca,T}$

$d_{T,\infty}$  Steady-state  $d_T$

$E_{Ca,L}$  Reversal potential of  $I_{Ca,L}$

$E_{Ca,T}$  Reversal potential of  $I_{Ca,T}$

$f_{CMi}$  Fractional occupancy of calmodulin by  $[Ca^{2+}]_i$

$f_{CMJ/NJ}$  Fractional occupancy of calmodulin by  $[Ca^{2+}]_{J/NJ}$

$f_{CQ}$  Fractional occupancy of calsequestrin by  $[Ca^{2+}]_{rel}$

$f_L$  Inactivation gating variable for  $I_{Ca,L}$

$f_{L,\infty}$  Steady-state  $f_L$

$f_T$  Inactivation gating variable for  $I_{Ca,T}$

$f_{T,\infty}$  Steady-state  $f_T$

$f_{TC}$  Fractional occupancy of the troponin  $Ca^{2+}$  site by  $[Ca^{2+}]_i$

|                     |                                                                                  |
|---------------------|----------------------------------------------------------------------------------|
| $f_{TMC}$           | Fractional occupancy of the troponin $Mg^{2+}$ site by $[Ca^{2+}]_i$             |
| $f_{TMM}$           | Fractional occupancy of the troponin $Mg^{2+}$ site by $Mg^{2+}$                 |
| $F$                 | Faraday constant                                                                 |
| $g_{Ca,L}$          | Maximum $I_{Ca,L}$ conductance                                                   |
| $g_{Ca,T}$          | Maximum $I_{Ca,T}$ conductance                                                   |
| $I_{Ca,L}$          | L-type $Ca^{2+}$ current                                                         |
| $I_{Ca,P}$          | Sarcolemmal $Ca^{2+}$ pump                                                       |
| $I_{Ca,T}$          | T-type $Ca^{2+}$ current                                                         |
| $I_{NaCa}$          | $Na^+$ - $Ca^{2+}$ exchange current (NCX)                                        |
| $J_{Ca\_diff}$      | $Ca^{2+}$ diffusion flux from junctional/non-junctional space to myoplasm        |
| $J_{Ca\_JNJ\_diff}$ | $Ca^{2+}$ diffusion flux between junctional/non-junctional spaces                |
| $J_{Ca\_up\_diff}$  | $Ca^{2+}$ diffusion flux between neighbouring network SR                         |
| $J_{rel}$           | $Ca^{2+}$ release flux from the junctional SR to junctional/non-junctional space |
| $J_{tr}$            | $Ca^{2+}$ transfer flux from the network SR to junctional SR                     |
| $J_{up}$            | $Ca^{2+}$ uptake flux from the myoplasm to network SR                            |
| $k_{bCM}$           | $Ca^{2+}$ dissociation constant for calmodulin                                   |
| $k_{bCQ}$           | $Ca^{2+}$ dissociation constant for calsequestrin                                |
| $k_{bTC}$           | $Ca^{2+}$ dissociation constant for troponin-Ca complex                          |
| $k_{bTMC}$          | $Ca^{2+}$ dissociation constant for troponin-Mg complex                          |
| $k_{bTMM}$          | $Mg^{2+}$ dissociation constant for troponin-Mg complex                          |
| $k_{fCM}$           | $Ca^{2+}$ association constant for calmodulin                                    |
| $k_{fCQ}$           | $Ca^{2+}$ association constant for calsequestrin                                 |
| $k_{fTC}$           | $Ca^{2+}$ association constant for troponin                                      |
| $k_{fTMC}$          | $Ca^{2+}$ association constant for troponin-Mg complex                           |

|               |                                                                                      |
|---------------|--------------------------------------------------------------------------------------|
| $k_{fTMM}$    | $Mg^{2+}$ association constant for troponin-Mg complex                               |
| $k_{NaCa}$    | Scaling factor for $I_{NaCa}$                                                        |
| $K_{rel}$     | Half-maximal $[Ca^{2+}]_{J/NJ}$ for $Ca^{2+}$ release from the junctional SR         |
| $K_{up}$      | Half-maximal $[Ca^{2+}]_i$ for $Ca^{2+}$ uptake by $Ca^{2+}$ -pump in the network SR |
| $[Na^+]_i$    | Intracellular $Na^+$ concentration                                                   |
| $[Na^+]_o$    | Extracellular $Na^+$ concentration                                                   |
| $P_{rel}$     | Rate constant for $Ca^{2+}$ release from the junctional SR                           |
| $P_{up}$      | Rate constant for $Ca^{2+}$ uptake by $Ca^{2+}$ -pump in the network SR              |
| $R$           | Universal gas constant                                                               |
| $RyR$         | Ryanodine receptor                                                                   |
| $SR$          | Sarcoplasmic reticulum                                                               |
| $t$           | Time                                                                                 |
| $T$           | Absolute temperature                                                                 |
| $[TC]_{tot}$  | Total concentration of troponin-Ca complex                                           |
| $[TMC]_{tot}$ | Total concentration of troponin-Mg complex                                           |
| $V$           | Membrane potential                                                                   |
| $V_{cell}$    | Cell volume                                                                          |
| $V_i$         | Myoplasmic volume                                                                    |
| $V_{J/NJ}$    | Volume of junctional and non-junctional compartments                                 |
| $V_{rel}$     | Volume of junctional SR                                                              |
| $V_{up}$      | Volume of network SR                                                                 |
| $y_{NaCa}$    | Position of energy barrier controlling voltage dependence of $I_{NaCa}$              |
| $\alpha_{dL}$ | Opening rate constant of $d_L$                                                       |
| $\alpha_{dT}$ | Opening rate constant of $d_T$                                                       |

|                         |                                                                                              |
|-------------------------|----------------------------------------------------------------------------------------------|
| $\alpha_{fL}$           | Opening rate constant of $f_L$                                                               |
| $\alpha_{fT}$           | Opening rate constant of $f_T$                                                               |
| $\beta_{dL}$            | Closing rate constant of $d_L$                                                               |
| $\beta_{dT}$            | Closing rate constant of $d_T$                                                               |
| $\beta_{fL}$            | Closing rate constant of $f_L$                                                               |
| $\beta_{fT}$            | Closing rate constant of $f_T$                                                               |
| $\tau_{Ca\_J/NJ\_diff}$ | Time constant for $Ca^{2+}$ diffusion between neighboring<br>junctional/non-junctional space |
| $\tau_{Ca\_up\_diff}$   | Time constant for $Ca^{2+}$ diffusion between neighboring network SR units                   |
| $\tau_{diff\_Ca}$       | Time constant for $Ca^{2+}$ diffusion from junctional/non-junctional<br>space to myoplasm    |
| $\tau_{dL}$             | Time constant of $d_L$                                                                       |
| $\tau_{dT}$             | Time constant of $d_T$                                                                       |
| $\tau_{fL}$             | Time constant of $f_L$                                                                       |
| $\tau_{fT}$             | Time constant of $f_T$                                                                       |
| $\tau_{tr}$             | Time constant for $Ca^{2+}$ transfer from the network SR to junctional SR                    |

## MODEL EQUATIONS

### L-type Ca<sup>2+</sup> channel current

$$I_{Ca,L} = g_{Ca,L} \times \left( f_L d_L + \frac{0.006}{1.0 + e^{\frac{-(V+14.1)}{6.0}}} \right) \times (V - E_{Ca,L})$$

$$\alpha_{d_L} = -14.19 \times \frac{V + 35.0}{e^{\frac{-(V+35.0)}{2.5}} - 1} - \frac{42.45V}{e^{-0.208V} - 1.0}$$

$$\beta_{d_L} = 5.71 \times \frac{V - 5}{e^{0.4(V-5)} - 1.0}$$

$$\tau_{d_L} = \frac{1.0}{\alpha_{d_L} + \beta_{d_L}}$$

$$d_{L\infty} = \frac{1.0}{1.0 + e^{\frac{-(V+23.1)}{6.0}}}$$

$$\frac{dd_L}{dt} = \frac{d_{L\infty} - d_L}{\tau_{d_L}}$$

$$\alpha_{f_L} = 3.12 \times \frac{V + 28.0}{e^{\frac{V+28.0}{4.0}} - 1.0}$$

$$\beta_{f_L} = \frac{25.0}{1.0 + e^{\frac{-(V+28.0)}{4.0}}}$$

$$\tau_{f_L} = \frac{1.0}{\alpha_{f_L} + \beta_{f_L}}$$

$$f_{L\infty} = \frac{1.0}{1.0 + e^{\frac{V+45.0}{5.0}}}$$

$$\frac{df_L}{dt} = \frac{f_{L\infty} - f_L}{\tau_{f_L}}$$

## T-type Ca<sup>2+</sup> channel current

$$I_{Ca,T} = g_{Ca,T} \times f_T \times d_T \times (V - E_{Ca,T})$$

$$\alpha_{d_T} = 1068e^{\frac{V+26.3}{30}}$$

$$\beta_{d_T} = 1068e^{-\frac{V+26.3}{30}}$$

$$\tau_{d_T} = \frac{1.0}{\alpha_{d_T} + \beta_{d_T}}$$

$$d_{T\infty} = \frac{1.0}{1.0 + e^{\frac{-(V+37)}{6.8}}}$$

$$\frac{dd_T}{dt} = \frac{d_{T\infty} - d_T}{\tau_{d_T}}$$

$$\alpha_{f_T} = 15.3 \times e^{\frac{V+71.7}{83.3}}$$

$$\beta_{f_T} = 15e^{-\frac{V+71.7}{15.38}}$$

$$\tau_{f_T} = \frac{1.0}{\alpha_{f_T} + \beta_{f_T}}$$

$$f_{T\infty} = \frac{1.0}{1.0 + e^{\frac{V+71}{9}}}$$

$$\frac{df_T}{dt} = \frac{f_{T\infty} - f_T}{\tau_{f_T}}$$

## Na<sup>+</sup>-Ca<sup>2+</sup> exchange current

$$I_{NaCa} = K_{NaCa} \cdot \frac{[Na^+]_i^3 \cdot [Ca^{2+}]_o \cdot e^{0.03743V y_{NaCa}} - [Na^+]_o^3 \cdot [Ca^{2+}]_{J/NJ} \cdot e^{0.03743V(y_{NaCa} - 1.0)}}{1.0 + d_{NaCa} \cdot ([Na^+]_i^3 \cdot [Ca^{2+}]_o + [Na^+]_o^3 \cdot [Ca^{2+}]_{J/NJ})}$$

## Intracellular Ca<sup>2+</sup> Dynamics

### Ca<sup>2+</sup> diffusion flux

$$J_{Ca\_diff} = \frac{[Ca^{2+}]_{J/NJ} - [Ca^{2+}]_i}{\tau_{diff\_Ca}}$$

**Ca<sup>2+</sup> diffusion flux between neighboured elements** For each of the coupled element array, indexed by  $k$  ( $k$  varies between 1 to 13):

$$J_{Ca\_J/NJ\_diff} = \frac{[Ca^{2+}]_{J/NJ}^{(k-1)} + [Ca^{2+}]_{J/NJ}^{(k+1)} - 2.0[Ca^{2+}]_{J/NJ}^{(k)}}{\tau_{Ca\_J/NJ\_diff}}$$

$$J_{Ca\_up\_diff} = \frac{[Ca^{2+}]_{up}^{(k-1)} + [Ca^{2+}]_{up}^{(k+1)} - 2.0[Ca^{2+}]_{up}^{(k)}}{\tau_{Ca\_up\_diff}}$$

### SR Ca<sup>2+</sup> regulation

$$J_{rel} = P_{rel} \cdot ([Ca^{2+}]_{rel} - [Ca^{2+}]_{J/NJ}) \cdot \frac{[Ca^{2+}]_{J/NJ}^2}{[Ca^{2+}]_{J/NJ}^2 + K_{rel}^2}$$

$$J_{up} = P_{up} \cdot \frac{[Ca^{2+}]_i}{[Ca^{2+}]_i + K_{up}}$$

$$J_{tr} = \frac{[Ca^{2+}]_{up} - [Ca^{2+}]_{rel}}{\tau_{tr}}$$

### Ca<sup>2+</sup> concentrations

$$\frac{d[Ca^{2+}]_i}{dt} = \frac{J_{Ca\_diff} \cdot V_{J/NJ} - J_{up} \cdot V_{up} - I_{CaP} / (2.0 \times F)}{V_i} - 1.0 \times ([CM]_{tot} \cdot f_{CMi\_rate} + [TC]_{tot} \cdot f_{TC\_rate} + [TMC]_{tot} \cdot f_{TMC\_rate})$$



$$\frac{d[Ca^{2+}]_{J/NJ}^{(periphery)}}{dt} = \frac{-(I_{CaL} + I_{CaT} - 2.0I_{NaCa}) / (2.0 \times F) + J_{rel} \cdot V_{rel}}{V_{sub}} - J_{Ca\_diff} + J_{Ca\_J/NJ\_diff} - [CM]_{tot} \cdot f_{CMs\_rate}$$

$$\frac{d[Ca^{2+}]_{J/NJ}^{(centre)}}{dt} = \frac{J_{rel} \cdot V_{rel}}{V_{sub}} - J_{Ca\_diff} + J_{Ca\_J/NJ\_diff} - [CM]_{tot} \cdot f_{CMs\_rate}$$

$$\frac{d[Ca^{2+}]_{rel}}{dt} = J_{tr} - J_{rel} - [CQ]_{tot} \cdot f_{CQ\_rate}$$

$$\frac{d[Ca^{2+}]_{up}}{dt} = J_{up} - J_{tr} \cdot \frac{V_{rel}}{V_{up}}$$

### Ca<sup>2+</sup> buffering

$$\frac{df_{TC}}{dt} = Kf_{TC} \cdot [Ca^{2+}]_i \cdot (1 - f_{TC}) - Kb_{TC} \cdot f_{TC}$$

$$\frac{df_{TMC}}{dt} = Kf_{TMC} \cdot [Ca^{2+}]_i \cdot (1 - f_{TMC} - f_{TMM}) - Kb_{TMC} \cdot f_{TMC}$$

$$\frac{df_{TMM}}{dt} = Kf_{TMM} \cdot [Mg^{2+}]_i \cdot (1 - f_{TMC} - f_{TMM}) - Kb_{TMM} \cdot f_{TMM}$$

$$\frac{df_{CMi}}{dt} = Kf_{CM} \cdot [Ca^{2+}]_i \cdot (1 - f_{CMi}) - Kb_{CM} \cdot f_{CMi}$$

$$\frac{df_{CMJ/NJ}}{dt} = Kf_{CM} \cdot [Ca^{2+}]_{J/NJ} \cdot (1 - f_{CMJ/NJ}) - Kb_{CM} \cdot f_{CMJ/NJ}$$

$$\frac{df_{CQ}}{dt} = Kf_{CQ} \cdot [Ca^{2+}]_{rel} \cdot (1 - f_{CQ}) - Kb_{CQ} \cdot f_{CQ}$$

## MODEL PARAMETER VALUES

| Model Parameters                                 | Values      |
|--------------------------------------------------|-------------|
| $[Ca^{2+}]_o$ (mM)                               | 2           |
| $[CM]_{tot}$ (mM)                                | 0.045       |
| $[CQ]_{tot}$ (mM)                                | 10          |
| $d_{NaCa}$                                       | 0.0001      |
| $E_{Ca,L}$ (mV)                                  | 46.4        |
| $E_{Ca,T}$ (mV)                                  | 45          |
| $F$ (C·M <sup>-1</sup> )                         | 96,484.60   |
| $g_{Ca,L}$                                       | 0.052709184 |
| $g_{Ca,T}$                                       | 0.0138823   |
| $k_{bCM}$ (ms <sup>-1</sup> )                    | 0.542       |
| $k_{bCQ}$ (ms <sup>-1</sup> )                    | 0.445       |
| $k_{bTC}$ (ms <sup>-1</sup> )                    | 0.446       |
| $k_{bTMC}$ (ms <sup>-1</sup> )                   | 0.00751     |
| $k_{bTMM}$ (ms <sup>-1</sup> )                   | 0.751       |
| $k_{jCM}$ (mM <sup>-1</sup> ·ms <sup>-1</sup> )  | 227.7       |
| $k_{jCQ}$ (mM <sup>-1</sup> ·ms <sup>-1</sup> )  | 0.534       |
| $k_{jTC}$ (mM <sup>-1</sup> ·ms <sup>-1</sup> )  | 88.8        |
| $k_{jTMC}$ (mM <sup>-1</sup> ·ms <sup>-1</sup> ) | 227.7       |
| $k_{jTMM}$ (mM <sup>-1</sup> ·ms <sup>-1</sup> ) | 2.277       |
| $k_{NaCa}$                                       | 2.20896E-5  |
| $K_{rel}$ (mM)                                   | 0.0012      |
| $K_{up}$ (mM)                                    | 0.00045     |
| $[Na^+]_i$ (mM)                                  | 8           |
| $[Na^+]_o$ (mM)                                  | 140         |
| $P_{rel}$ (ms <sup>-1</sup> )                    | 1.8         |
| $P_{up}$ (mM/ms)                                 | 0.005       |
| $R$ (J·mol <sup>-1</sup> ·K <sup>-1</sup> )      | 8.314472    |
| $T$ (K)                                          | 310         |
| $[TC]_{tot}$ (mM)                                | 0.031       |
| $[TMC]_{tot}$ (mM)                               | 0.062       |

|                              |        |
|------------------------------|--------|
| $V_i$ (pl)                   | 13     |
| $V_{J/NJ}$ (pl)              | 0.84   |
| $V_{rel}$ (pl)               | 0.2352 |
| $V_{up}$ (pl)                | 1.624  |
| $y_{NaCa}$                   | 0.5    |
| $\tau_{tr}$ (ms)             | 60     |
| $\tau_{diff\_Ca}$ (ms)       | 0.04   |
| $\tau_{Ca\_J/NJ\_diff}$ (ms) | 0.4    |
| $\tau_{Ca\_up\_diff}$ (ms)   | 600    |

## INITIAL CONDITIONS

| Model Variables         | Initial Values |
|-------------------------|----------------|
| $V$ , mV                | -40            |
| $f_L$                   | 0.268941       |
| $d_L$                   | 0.05643        |
| $f_T$                   | 0.030935       |
| $d_T$                   | 0.391461       |
| $[Ca^{2+}]_i$ , mM      | 0.000038       |
| $[Ca^{2+}]_{J/NJ}$ , mM | 0.000056       |
| $[Ca^{2+}]_{rel}$ , mM  | 1.613677       |
| $[Ca^{2+}]_{up}$ , mM   | 1.613684       |
| $f_{CMi}$               | 0.015683       |
| $f_{CMJ/NJ}$            | 0.02313        |
| $f_{CQ}$                | 0.607183       |
| $f_{TC}$                | 0.007498       |
| $f_{TMC}$               | 0.138813       |
| $f_{TMM}$               | 0.760791       |

## MODEL VALIDATION

### 1. Effect of increasing $\text{Ca}^{2+}$ influx by elevating $[\text{Ca}^{2+}]_o$

It has been shown that an increase in  $\text{Ca}^{2+}$  influx by elevating  $[\text{Ca}^{2+}]_o$  helps to sustain full  $\text{Ca}^{2+}$  wave propagation towards the central region and reduces the  $[\text{Ca}^{2+}]_i$  spatial heterogeneity in atrial cells (1). This experimental observation was reproduced by the model for validation purposes. In the model, an augmented  $\text{Ca}^{2+}$  influx was simulated by elevating the extracellular  $\text{Ca}^{2+}$  concentration ( $[\text{Ca}^{2+}]_o$ ) from 1 mM to 10 mM (Fig. S1). Such an increase in  $\text{Ca}^{2+}$  influx produced a larger  $[\text{Ca}^{2+}]_i$  transient in the peripheral region, and thus produced an enhanced  $\text{Ca}^{2+}$  wave. Fig. S1A presents a line scan image of the  $[\text{Ca}^{2+}]_i$  transient across the cell. In this figure, the cell was paced under control conditions for several beats before  $[\text{Ca}^{2+}]_o$  was increased. The  $\text{Ca}^{2+}$  wave propagation was promoted after increasing  $[\text{Ca}^{2+}]_o$  (Fig. S1A). Fig. S1B and C represented the time courses of the  $[\text{Ca}^{2+}]_i$  transient and SR  $\text{Ca}^{2+}$  content ( $[\text{Ca}^{2+}]_{\text{SR}}$ ) recorded from sites near the periphery (black) and in the central regions (red) for control (Fig. S1B) and increased  $[\text{Ca}^{2+}]_o$  (Fig. S1C) conditions. It was shown that enhanced inward  $\text{Ca}^{2+}$  wave propagation was evoked by increasing  $[\text{Ca}^{2+}]_o$  (Fig. S1C). These simulation results match the experimental data of Mackenzie *et al.* (1) as shown in Inset A and B .

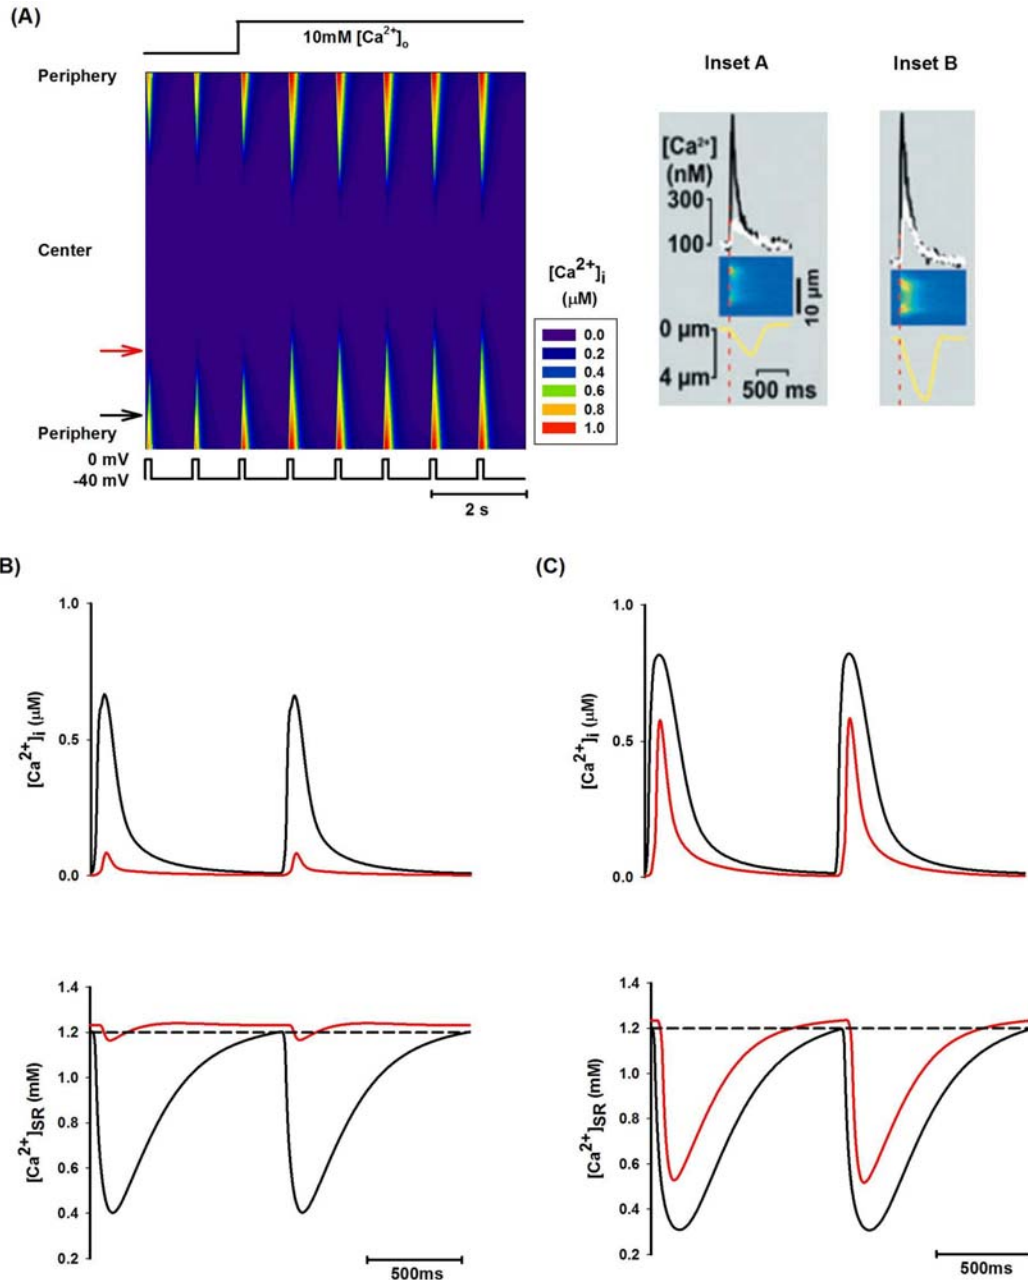

Figure S1. Enhanced  $Ca^{2+}$  wave propagation induced by increasing  $[Ca^{2+}]_o$ . (A): The line scan image of cytoplasmic  $[Ca^{2+}]_i$  transients.  $[Ca^{2+}]_o$  was increased to 10 mM after the first 2 pulses. Inset A and B: The experimental data of  $[Ca^{2+}]_i$  transients before (Inset A) and after (Inset B) raising  $[Ca^{2+}]_o$  from 1 to 10 mM. The inset panels demonstrate the time traces of  $[Ca^{2+}]_i$  transients at peripheral (black) and central (white) regions. The line scan images under the traces illustrate spatial  $[Ca^{2+}]_i$  transient distribution across the cell. The yellow traces beneath the line scan images show the twitch of the cell. Experimental data was adapted from Mackenzie *et al.* (1). (B) and (C): Simulation results of  $[Ca^{2+}]_i$  (top) and  $[Ca^{2+}]_{SR}$  (bottom) recorded from peripheral (black) and central (red) regions of the cell before (B) and after (C) increasing  $[Ca^{2+}]_o$ .

## 2. Effect of increasing RyR sensitivity

Previous experimental studies have shown that increasing the sensitivity of RyR to intracellular  $\text{Ca}^{2+}$  for CICR (as can be done with a low concentration of caffeine) helps to sustain full  $\text{Ca}^{2+}$  wave propagation to the central region of atrial myocytes (1). The model was able to reproduce this experimental observation. In simulations, the threshold of RyR for CICR ( $K_{\text{rel}}$ ) was decreased by 10%. In order to exclude possible interactions from varied SR load, the rate of SERCA  $\text{Ca}^{2+}$  uptake ( $P_{\text{up}}$ ) was increased by 40% to maintain the SR  $\text{Ca}^{2+}$  content comparable to that in control condition. As enhanced RyR sensitivity enabled efficient CICR in the central region, complete  $\text{Ca}^{2+}$  wave spread towards the interior region of the cell was observed. Similar to the results of Fig. S1 where  $\text{Ca}^{2+}$  influx was increased, large  $[\text{Ca}^{2+}]_i$  transients were sustained throughout the cell upon decreasing  $K_{\text{rel}}$  (Fig. S2A). Consequentially the amplitude of the  $[\text{Ca}^{2+}]_i$  transients became homogeneous across the cell as shown in Fig. S2B and S2C. These simulation results (Fig. S2B and S2C) were similar to experimental observations (Inset B) from atrial myocytes devoid of t-tubules (1). The time delays in the  $[\text{Ca}^{2+}]_i$  and  $[\text{Ca}^{2+}]_{\text{SR}}$  transients between the peripheral and central regions of the cell (Inset A, C and D) demonstrated that the  $\text{Ca}^{2+}$  wave was first initiated in peripheral regions and then conducted towards the centre of the cell.

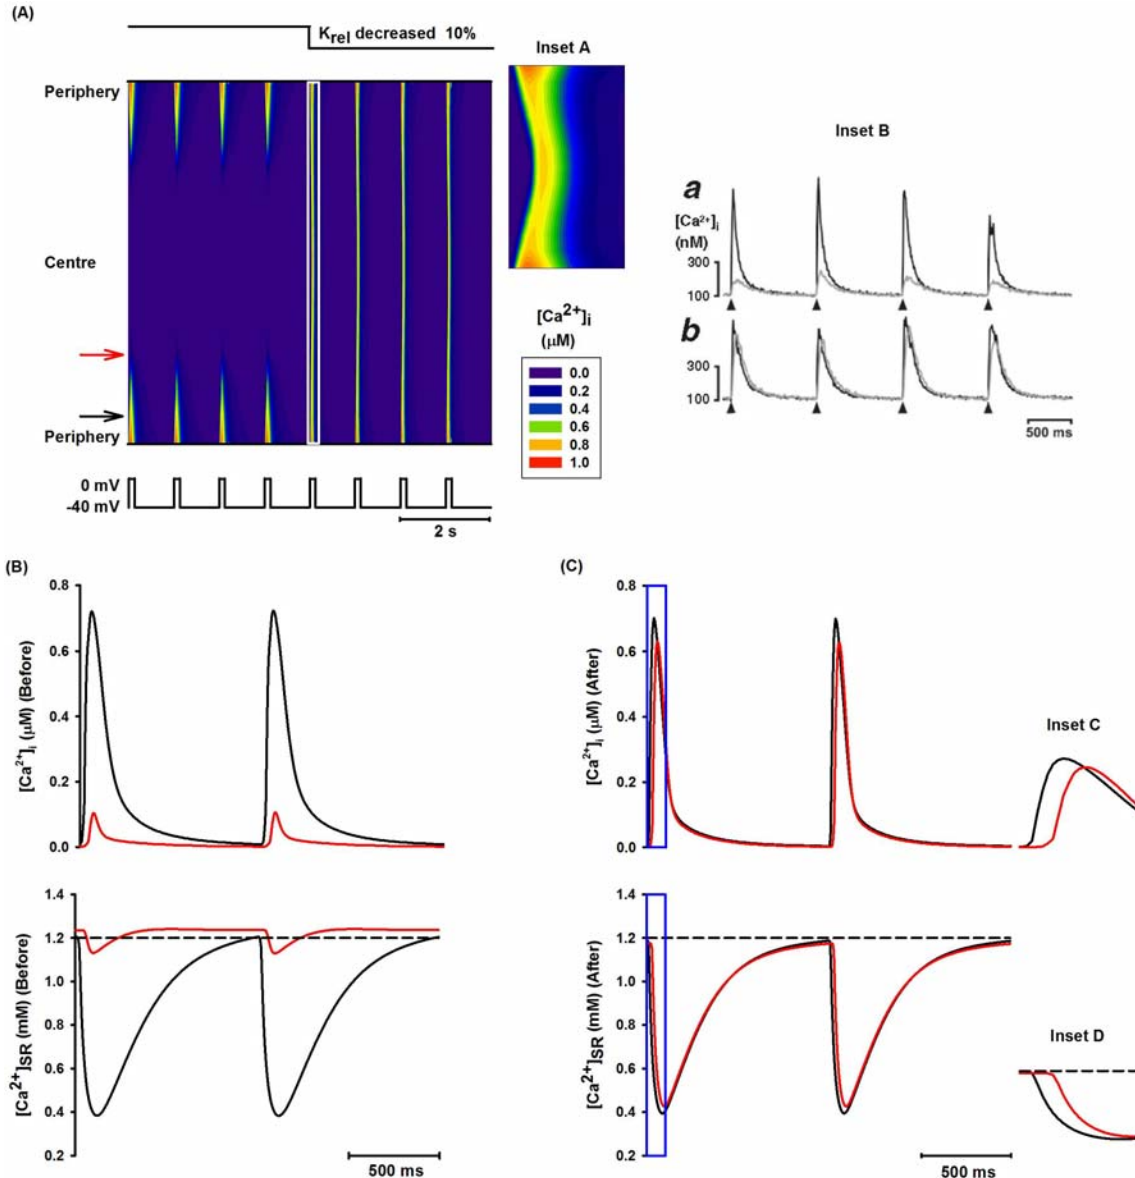

Figure S2. Enhanced  $\text{Ca}^{2+}$  diffusion induced by decreasing the threshold of RyR for CICR ( $K_{\text{rel}}$ ) to simulate effect of low dose caffeine. (A) Line scan image of cytoplasmic  $\text{Ca}^{2+}$ . The top part of the figure shows  $K_{\text{rel}}$  protocol. Inset A: expanded plot of line scan image for the time period marked by the white box. Inset B: The experimental data of peripheral (black) and central (white)  $[\text{Ca}^{2+}]_i$  transients before (Inset Ba) and after (Inset Bb) applying 0.1 mM caffeine (1). (B) and (C): Simulation results of  $[\text{Ca}^{2+}]_i$  (top) and  $\text{Ca}^{2+}$  concentration in SR space (bottom) recorded from the peripheral (back) and central (red) regions of the cell before (B) and after (C) increasing the sensitivity of RyR. Inset C and D: expanded plots of  $[\text{Ca}^{2+}]_i$  and  $[\text{Ca}^{2+}]_{\text{SR}}$  for the time period marked by the blue boxes in (C), illustrating a phase lag of  $[\text{Ca}^{2+}]_i$  transients and  $[\text{Ca}^{2+}]_{\text{SR}}$  transients between the peripheral and central elements.



### 3. Effect of increased SR content

Another experimental technique which can result in full  $\text{Ca}^{2+}$  wave propagation in atrial myocytes lacking t-tubules is to increase the SR content (1). In order to mimic that effect, the model was first paced for 3 s till a steady state was reached under the control condition. Then the stimulus was stopped for 10 s, during which and afterwards,  $P_{\text{up}}$  was increased by 75% to enhance the SR  $\text{Ca}^{2+}$  accumulation. Then the stimulation pulses were reactivated to examine the SR  $\text{Ca}^{2+}$  concentration and spatial dispersion of  $[\text{Ca}^{2+}]_i$  transients throughout the cell. As a result,  $\text{Ca}^{2+}$  waves fully propagated from the periphery into the centre of the cell (Fig. S3A and Inset A) with a spatially homogenous distribution of  $[\text{Ca}^{2+}]_i$  transients. As shown in Fig. S3B and S3C (bottom panels), such a manoeuvre increases the maximal SR  $\text{Ca}^{2+}$  concentration by 28.6% in the peripheral region and by 24.1% in the central region as compared to the control condition. This elevated SR  $\text{Ca}^{2+}$  content promoted  $\text{Ca}^{2+}$  release in both the peripheral and central regions of the cell (Fig. S3B and S3C; top panels). These simulation results also matched to experimental data (Inset B) obtained from atrial myocytes absent of t-tubules (1). The time delays in the  $[\text{Ca}^{2+}]_i$  and  $[\text{Ca}^{2+}]_{\text{SR}}$  transients between the peripheral and central regions (Inset A, C and D) indicated that  $\text{Ca}^{2+}$  signals were initiated in peripheral elements rather than homogeneously throughout the cell.

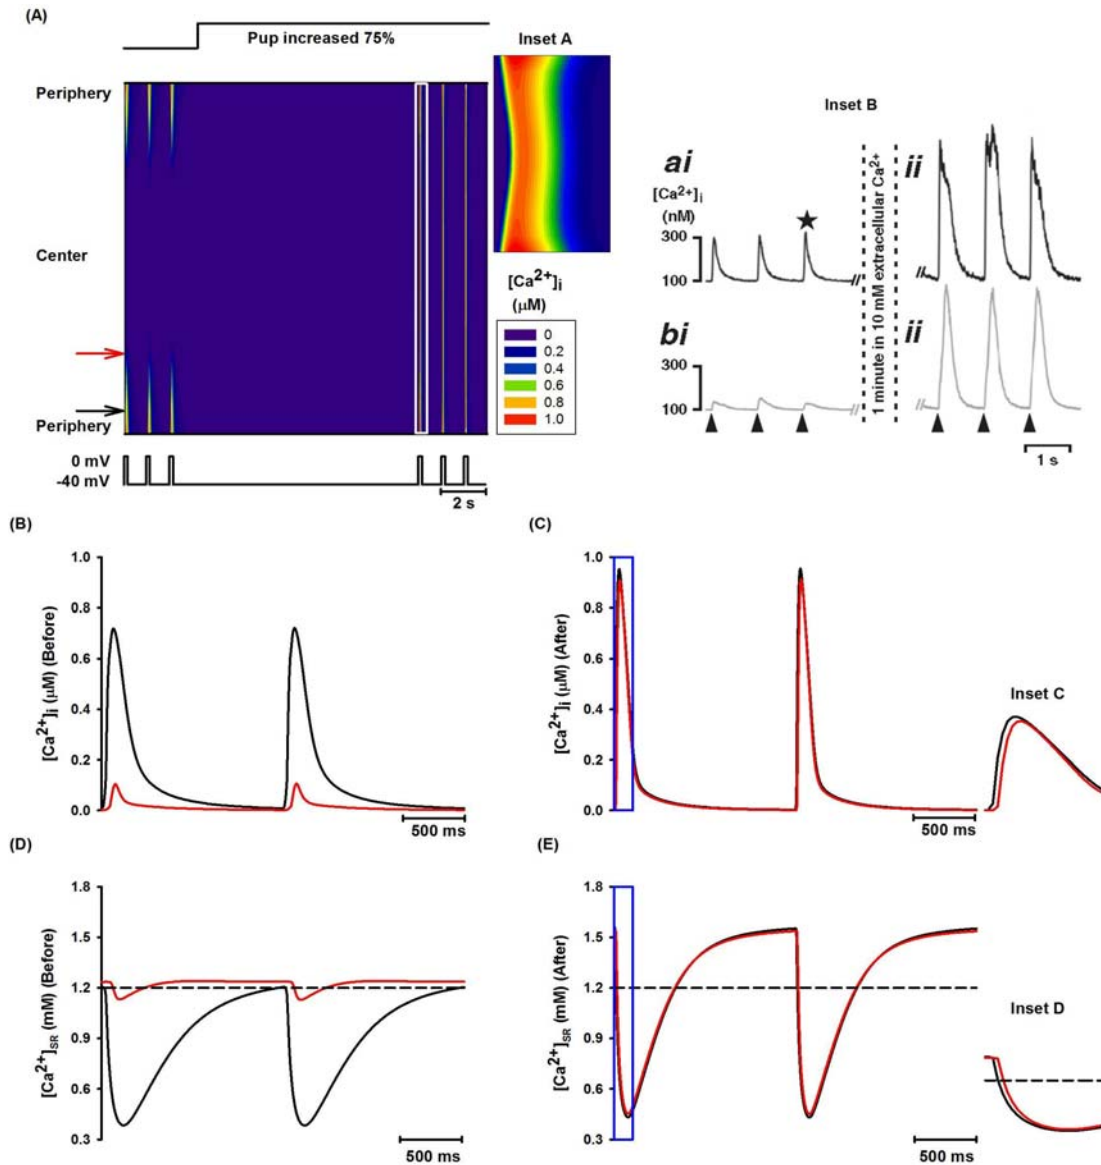

Figure S3.  $\text{Ca}^{2+}$  wave propagation induced by elevating the SR  $\text{Ca}^{2+}$  content in atrial myocytes. (A): Line scan image of cytoplasmic  $\text{Ca}^{2+}$ . The SR  $\text{Ca}^{2+}$  load was elevated by increasing the  $\text{Ca}^{2+}$  uptake of SR while no stimuli were applied for 10 seconds. Inset A: expanded plot of line scan image for the time period marked by the white box, which illustrated that the  $\text{Ca}^{2+}$  wave was initiated from the peripheral region and then propagated into the central region. Inset B: The experimental data of peripheral (Inset Ba) and central (Inset Bb)  $[\text{Ca}^{2+}]_i$  transients before (Inset Bai and Bbi) and after (Inset Bii and Bbii) increasing the SR content (1). (B) and (C): Simulation results of  $[\text{Ca}^{2+}]_i$  (top) and  $[\text{Ca}^{2+}]_{\text{SR}}$  (bottom) recorded from the peripheral (back) and central (red) regions of the cell before (B) and after (C) increasing the SR content. In panels B and C, red traces correspond to the position marked by the red arrow in panel A while black traces

correspond to the black arrow. Insets *C* and *D*: expanded plots of  $[Ca^{2+}]_i$  and  $[Ca^{2+}]_{SR}$  for the time periods marked by the blue boxes in panel *C*.

### **Effect of intra-SR $Ca^{2+}$ diffusion**

Previous studies have shown that the SR  $Ca^{2+}$  release associated with the SR  $Ca^{2+}$  content plays a crucial role in  $Ca^{2+}$  wave generation (2, 3). As the refilling of the SR after  $Ca^{2+}$  release is associated with the intra-SR  $Ca^{2+}$  diffusion (2, 3), in the present study, we examined the effects of the intra-SR  $Ca^{2+}$  diffusion on  $Ca^{2+}$  wave propagation by modulating the  $Ca^{2+}$  diffusion from NSR to JSR. In simulations, the time constant for  $Ca^{2+}$  diffusion from NSR to JSR ( $\tau_{tr}$ ) was increased by two times to slow down the  $Ca^{2+}$  diffusion between NSR and JSR. As a result, a fully propagating  $Ca^{2+}$  wave was followed by a non-propagated wave, which repeated for every two stimulus cycles (Fig. S4A). This was attributable to the slowing down of the  $Ca^{2+}$  transportation from NSR and JSR that produced incomplete recovery of the JSR before the next stimulus and thus produced a small  $Ca^{2+}$  release (Fig. S4B and S4C). As the  $Ca^{2+}$  release was small, no  $Ca^{2+}$  wave was induced and therefore, the SR could recover to the level that was able to generate a full  $Ca^{2+}$  wave propagation (Fig. S4A and S4C) (4, 5) in the next pacing cycle. All of this process repeated producing  $Ca^{2+}$  alternans.

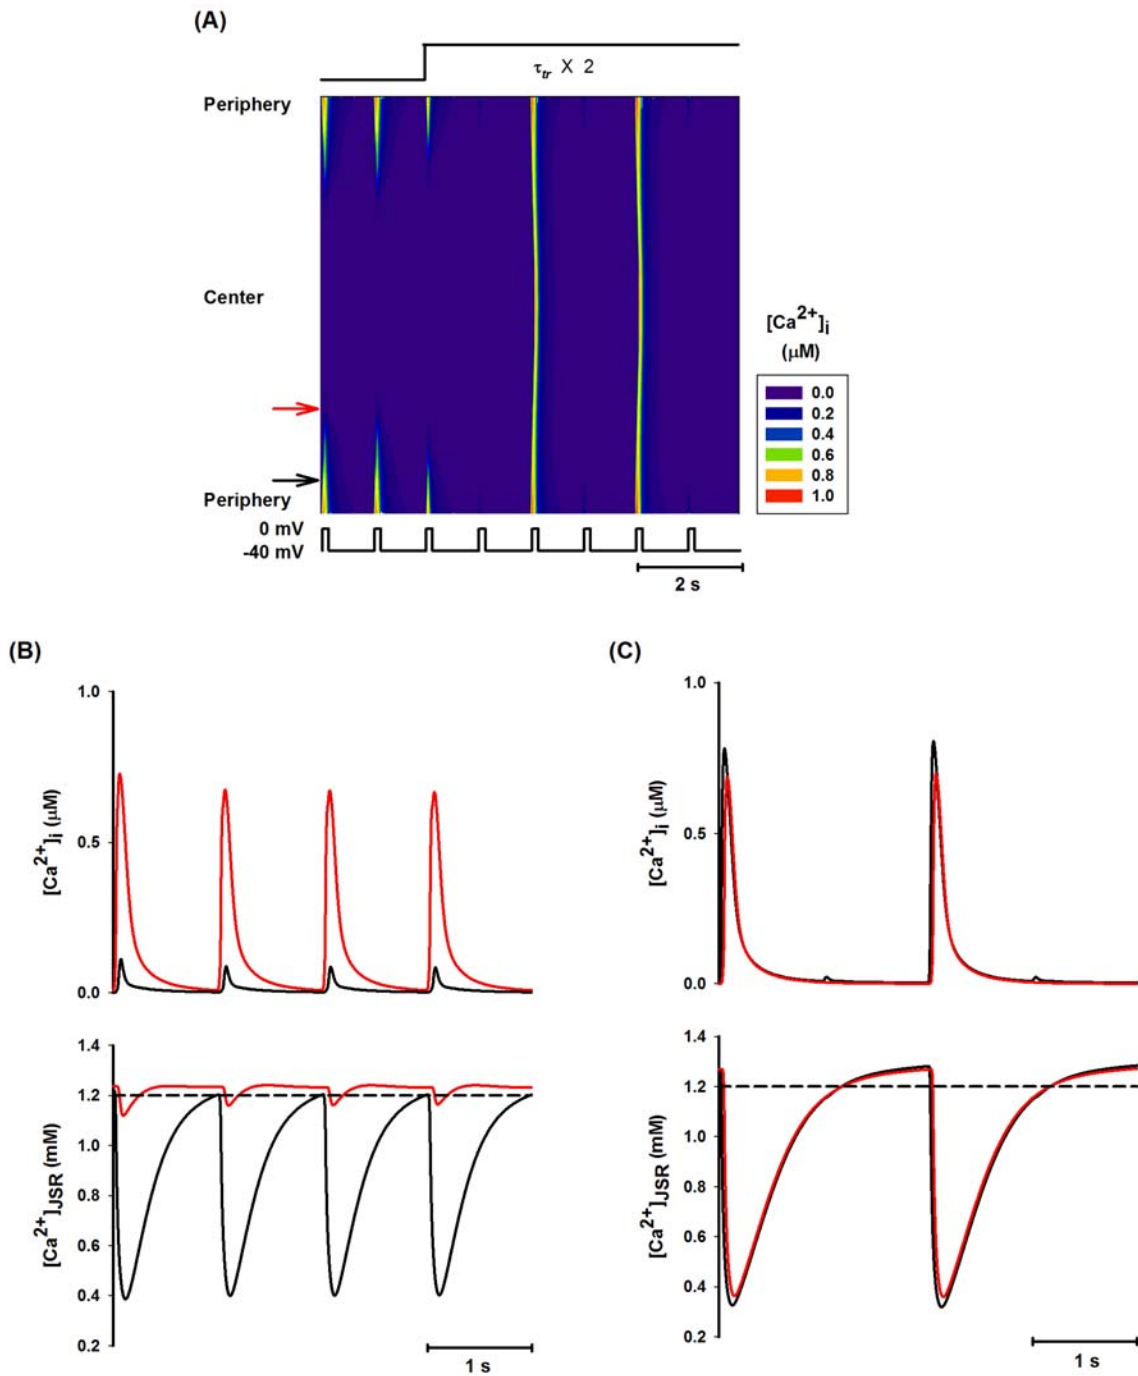

Figure S4. Effect of slowing down  $Ca^{2+}$  diffusion from NSR to JSR by increasing the time constant of  $Ca^{2+}$  diffusion ( $\tau_{tr}$ ) by two times. (A): Line scan image of spatial patterns of  $[Ca^{2+}]_i$  transients. (B) and (C): Traces of  $[Ca^{2+}]_i$  transients (top) and  $Ca^{2+}$  concentration in SR space (bottom) recorded from peripheral (back) and central (red) regions of the cell before (B) and after (C) decreasing  $Ca^{2+}$  diffusion between NSR and JSR.

Similar alternans was also observed when the  $\text{Ca}^{2+}$  diffusion between neighbouring NSRs was slowed down (Fig. S5A). This was done by increasing the time constant for  $\text{Ca}^{2+}$  diffusion between neighbouring NSRs ( $\tau_{\text{Ca\_up\_diff}}$ ) by five times. When the inter-element diffusion was slowed down,  $[\text{Ca}^{2+}]_i$  alternans were produced as shown in Fig. S5C.

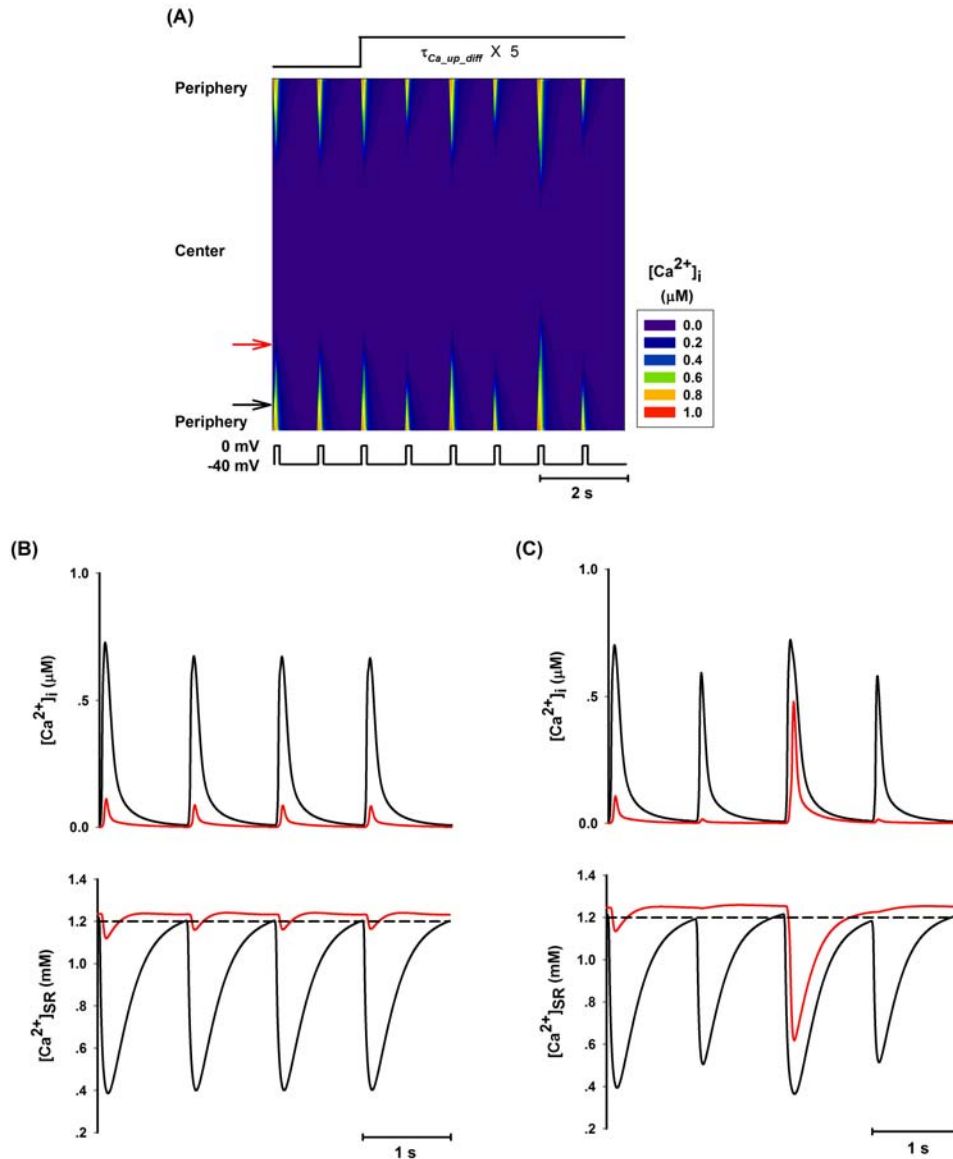

Figure S5. Effect of slowing down  $\text{Ca}^{2+}$  diffusion between neighbouring NSR by increasing the time constant of  $\text{Ca}^{2+}$  diffusion ( $\tau_{\text{Ca\_up\_diff}}$ ) by five times. (A) Line scan of spatial patterns of  $[\text{Ca}^{2+}]_i$  transients. (B) and (C) Traces of  $[\text{Ca}^{2+}]_i$  transients (top) and  $\text{Ca}^{2+}$  concentration in SR space (bottom) recorded from peripheral (back) and central (red) regions of the cell before (B) and after (C) decreasing  $\text{Ca}^{2+}$  diffusion velocity between neighbouring NSR.

## Exploring $\text{Ca}^{2+}$ alternans in 2D parameter spaces

*$P_{\text{up}}$ - $K_{\text{rel}}$  parameter space.* Combined effects of an increased SERCA pump activity and an increased RyR sensitivity on generating  $[\text{Ca}^{2+}]_i$  alternans were investigated in the  $P_{\text{up}}$ - $K_{\text{rel}}$  parameter space. Results are shown in Fig. S6, which illustrates the regional distribution of  $[\text{Ca}^{2+}]_i$  alternans in the  $P_{\text{up}}$ - $K_{\text{rel}}$  parameter-space. In Fig. S6A, color from dark blue to bright red represented 1 to 10 different peaks in the measured systolic  $[\text{Ca}^{2+}]_i$  transient that repeated cyclically, with 1 representing no alternans (Fig. S6B and C), 2 representing 1:1 alternans (Fig. S6D), and large number (n) representing complicated pattern (1:n-1) of alternans (Fig. S6E; 3 different peaks of systolic  $[\text{Ca}^{2+}]_i$ ). With a combined modulation of  $P_{\text{up}}$  and  $K_{\text{rel}}$ , various patterns of  $[\text{Ca}^{2+}]_i$  transients were generated in different parameter regions. With a combined increase in both the SERCA pump activity and the sensitivity of RyR to CICR, more spatially homogeneous  $[\text{Ca}^{2+}]_i$  transients throughout the cell were observed, though the amplitude of systolic  $[\text{Ca}^{2+}]_i$  decreased (Fig. S6E, 70% of control  $K_{\text{rel}}$  and 112% of control  $P_{\text{up}}$ ). No  $[\text{Ca}^{2+}]_i$  alternans were observed when  $P_{\text{up}}$  was increased by over 50%.

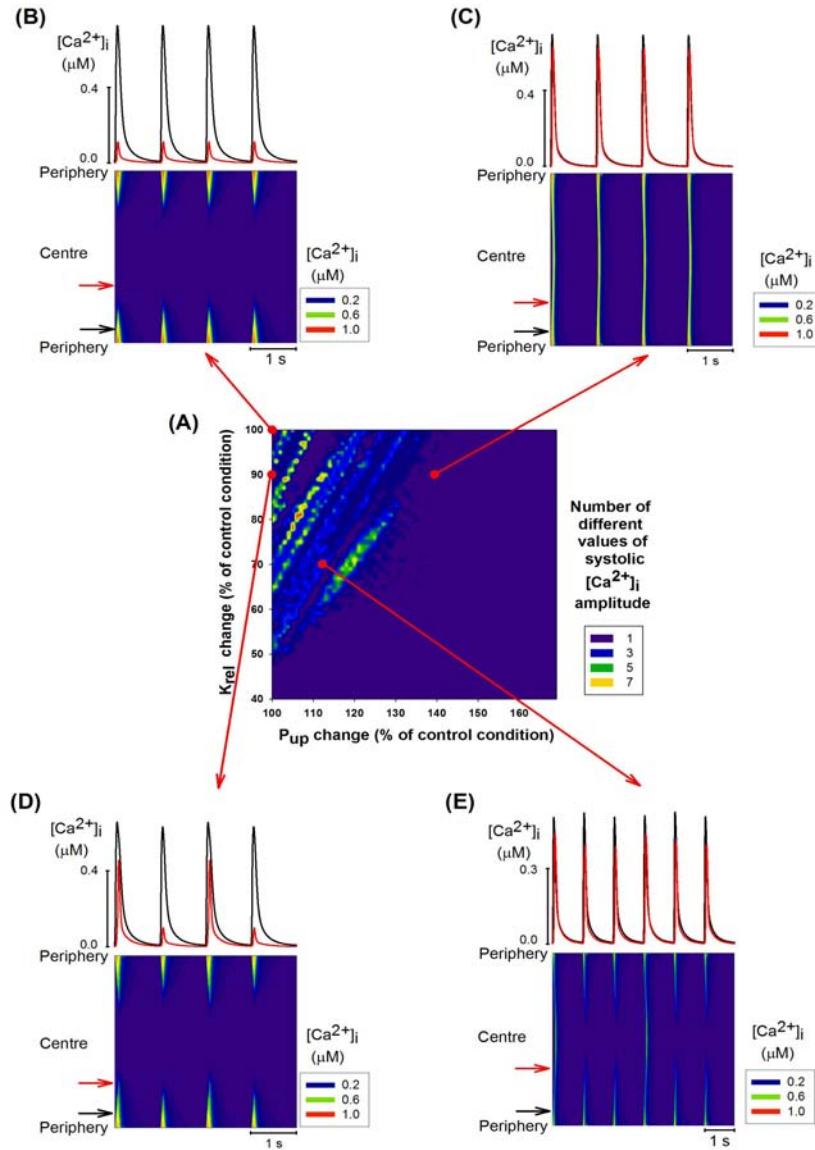

Figure S6. Distribution of systolic  $\text{Ca}^{2+}$  alternans in the  $P_{\text{up}}-K_{\text{rel}}$  space. (A): Alternans distribution with both increasing  $P_{\text{up}}$  and decreasing  $K_{\text{rel}}$ . The degrees of disordered  $\text{Ca}^{2+}$  transients were color coded in the 2D parameter space. Dark blue stands for steady  $\text{Ca}^{2+}$  transients from beat to beat as shown in panel B and C. Red regions stand for unstable or even chaotic  $\text{Ca}^{2+}$  transients from beat to beat. Panels (B) to (D) show the detail profiles of  $\text{Ca}^{2+}$  transients at the sites labelled in 2D parameter space (panel A). The top portions of these four panels are the time traces of  $\text{Ca}^{2+}$  transients in the peripheral and central regions of the cell. The bottom portions are line scan images of cytoplasmic  $\text{Ca}^{2+}$  transients across the cell. Various patterns of  $\text{Ca}^{2+}$  transients were illustrated from control condition (panel B) to alternating conditions (panel D and E).

$P_{up}$ - $K_{up}$  space. Combined effects of co-modulating the pump threshold and pump rate of SERCA on generating  $[Ca^{2+}]_i$  alternans were investigated in the  $P_{up}$ - $K_{up}$  parameter-space. Results were shown in Fig. S7. Fig. S7A illustrates the regional distribution of  $[Ca^{2+}]_i$  alternans in the  $P_{up}$ - $K_{up}$  space. Various patterns of alternans (1:1:1, Fig. S7B; 1:1, Fig. S7C) were also observed. In addition, a spatial homogenous  $[Ca^{2+}]_i$  transient was observed as shown in Fig. S7E.

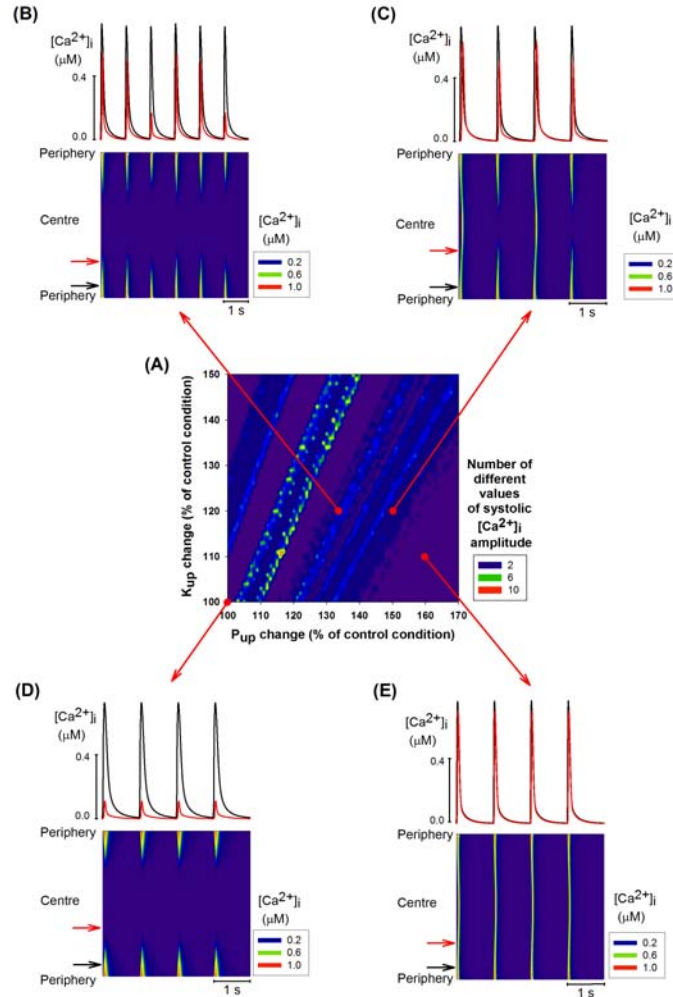

Figure S7. Distribution of systolic  $Ca^{2+}$  alternans in  $P_{up}$ - $K_{up}$  space. (A) Alternans distribution with increasing both  $P_{up}$  and  $K_{up}$ . Dark blue regions stand for steady  $Ca^{2+}$  transients from beat to beat as shown in panels D and E. Red regions stand for unstable or even chaotic  $Ca^{2+}$  transients from beat to beat. Panels (B) to (D) show the detail profiles of  $Ca^{2+}$  transients at the sites labelled in 2D parameter space (panel A). The top portions of these four panels are the time traces of  $Ca^{2+}$  transients in the peripheral and central region of the cell. The bottom portions are line scan of cytoplasmic  $Ca^{2+}$  transients across the cell.



*P<sub>up</sub>-g<sub>CaL</sub> space.* Combined effects of increased Ca<sup>2+</sup> influx with an increased SERCA pump activity on generating [Ca<sup>2+</sup>]<sub>i</sub> alternans were investigated in the P<sub>up</sub>-g<sub>CaL</sub> parameter space. Results were shown in Fig. S8. Complex patterns of systolic [Ca<sup>2+</sup>]<sub>i</sub> profiles were mainly present in two areas: left bottom and top right corners as shown in panel A. Fig. S8D represents the control condition and Fig. S8C showed an enhanced Ca<sup>2+</sup> propagation wave and a spatial homogenous [Ca<sup>2+</sup>]<sub>i</sub> distribution in the cell with a modest increase in the Ca<sup>2+</sup> influx, but a significant increase in the SERCA pump activity. When both the Ca<sup>2+</sup> influx and SERCA pump activity were modestly increased, 1:1 [Ca<sup>2+</sup>]<sub>i</sub> alternans were observed with more dramatic effects seen in the central region (Fig. S8E).

It was shown that the disordered [Ca<sup>2+</sup>]<sub>i</sub> transient observed in the left bottom (close to the control condition) and the top right corner regions (significantly increased P<sub>up</sub> and g<sub>CaL</sub>) of P<sub>up</sub>-g<sub>CaL</sub> parameter space were completely different. With dramatic increases in both the Ca<sup>2+</sup> influx and the SR uptake efficiency, a spontaneous second Ca<sup>2+</sup> release occurred in response to one stimulus as shown in Fig. S8B due to the SR Ca<sup>2+</sup> overload.

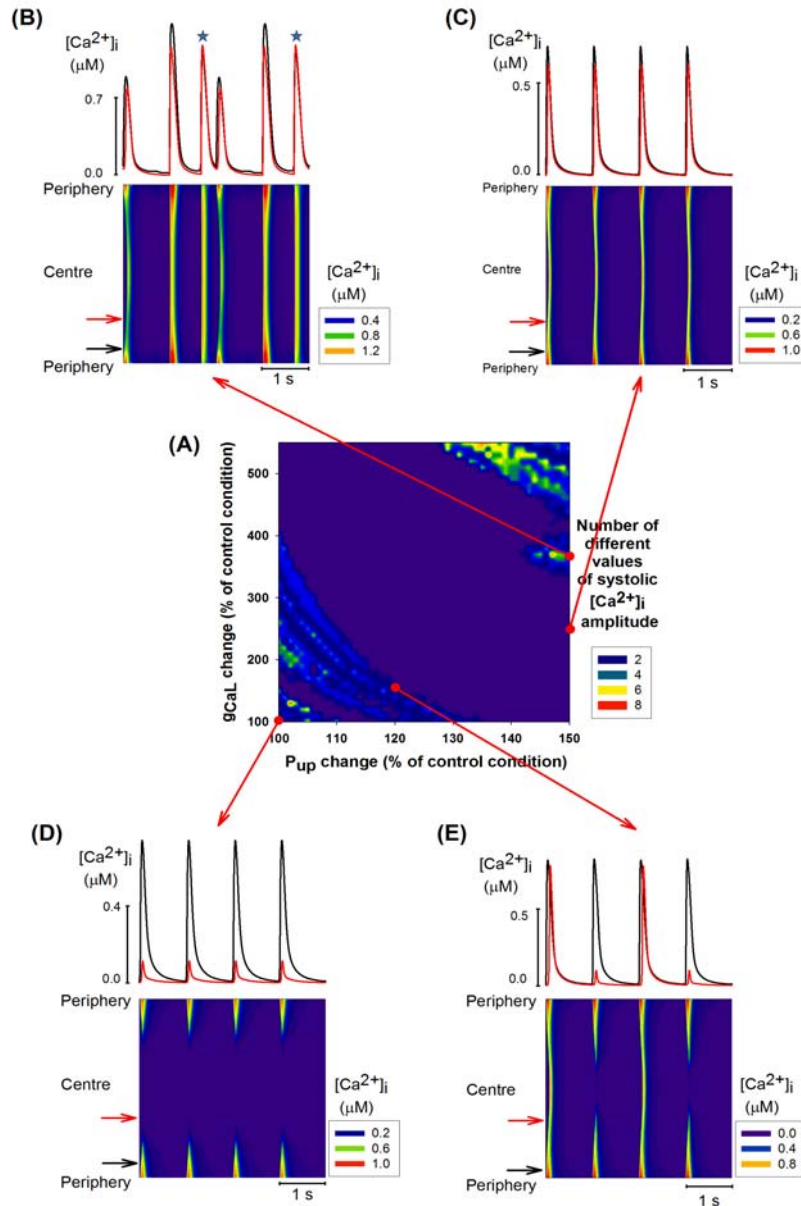

Figure S8. Distribution of systolic  $\text{Ca}^{2+}$  alternans in  $P_{\text{up}}-g_{\text{CaL}}$  space. (A) Alternans distribution with increasing both  $P_{\text{up}}$  and  $g_{\text{CaL}}$ . Dark blue regions stand for steady  $\text{Ca}^{2+}$  transients from beat to beat as shown in panels C and D. Red regions stand for unstable even chaotic  $\text{Ca}^{2+}$  transients from beat to beat. Panels (B) to (E) show the detail profiles of  $\text{Ca}^{2+}$  transients at the sites labelled in 2D parameter space (panel A). The top portions of these four panels are the time traces of  $\text{Ca}^{2+}$  transients in the peripheral and central region of the cell. The bottom portions are line scan of cytoplasmic  $\text{Ca}^{2+}$  transients across the cell. In panel B, a second  $\text{Ca}^{2+}$  release during the same stimulation interval is marked by the asterisk.

*Roles of Ca<sup>2+</sup> handling kinetics – insights from 2-parameter analysis.* Analyses based on 2-parameter spaces provided other meaningful insights into the generation of Ca<sup>2+</sup> alternans when two parameters associated with Ca<sup>2+</sup> cycling kinetics were co-modulated. For example, results shown in Fig. S6 and S8 in P<sub>up</sub>-K<sub>rel</sub> and P<sub>up</sub>-g<sub>CaL</sub> parameter spaces indicated that increasing P<sub>up</sub> (the rate for Ca<sup>2+</sup> uptake by SR Ca<sup>2+</sup> pumps) tended to suppress the genesis of Ca<sup>2+</sup> alternans that would be generated if g<sub>CaL</sub> or K<sub>rel</sub> was modulated alone. This may be explained by the fact that an increased SR uptake allowed the SR content to be refilled with relative ease to such a level that produced a large Ca<sup>2+</sup> release, avoiding the genesis of alternans (Fig. S6 and S8). Interestingly, when P<sub>up</sub> was increased over a certain value in both of the P<sub>up</sub>-g<sub>CaL</sub> and P<sub>up</sub>-K<sub>rel</sub> parameter spaces, no alternans were observed. However, in the P<sub>up</sub>-K<sub>up</sub> space, alternans were observed in most of the parameter region (Fig. S7), indicating that a defected SR uptake due to an elevated threshold played a more significant role in generating Ca<sup>2+</sup> alternans, which could not be counter-balanced by increased maximal pump activity of the SERCA (P<sub>up</sub>).

## References

1. Mackenzie, L., H. L. Roderick, M. J. Berridge, S. J. Conway, and M. D. Bootman. 2004. The spatial pattern of atrial cardiomyocyte calcium signalling modulates contraction. *J. Cell. Sci.* 117:6327-37.
2. Zima, A. V., E. Picht, D. M. Bers, and L. A. Blatter. 2008. Termination of cardiac Ca<sup>2+</sup> sparks: role of intra-SR [Ca<sup>2+</sup>], release flux, and intra-SR Ca<sup>2+</sup> diffusion. *Circ. Res.* 103(8):e105-15.
3. Lukyanenko, V., S. Subramanian, I. Györke, T. F. Wiesner, and S. Györke. 1999. The role of luminal Ca<sup>2+</sup> in the generation of Ca<sup>2+</sup> waves in rat ventricular myocytes. *J. Physiol.* 518(1):173-86.
4. Diaz, M. E., S. C. O'Neill, and D. A. Eisner. 2004. Sarcoplasmic reticulum calcium content fluctuation is the key to cardiac alternans. *Circ. Res.* 94:650-656.
5. Tao, T., S. C. O'Neill, M. E. Diaz, Y. T. Li, D. A. Eisner, and H. Zhang. 2008. Alternans of cardiac calcium cycling in a cluster of ryanodine receptors: A simulation study. *Am. J. Physiol.* 295:H595-H609.
